# Supplementary material for: Porous nanosheets of Cu3P@N,P co-doped carbon hosted on copper foam as an efficient and ultrastable pH-universal hydrogen evolution electrocatalyst
Source: Royal Society of Chemistry journal article supplement (doi:10.1039/d1se00161b), 2021-01-01
Supplement: d1se00161b1.pdf [file d1se00161b1.pdf]

# Supporting Information

## **Porous nanosheets of Cu<sub>3</sub>P@N, P co-doped carbon hosted on copper foam as an efficient and ultrastable pH-universal hydrogen evolution electrocatalyst**

Enjun Jiang<sup>‡a</sup>, Jianhong Jiang<sup>‡b</sup>, Guo Huang<sup>a</sup>, Zhiyi Pan<sup>a</sup>, Xiyong Chen<sup>a</sup>, Guifang Wang<sup>a</sup>, Shaojian Ma<sup>a</sup>, Jinliang Zhu<sup>\*a</sup> and Pei Kang Shen<sup>a</sup>

<sup>a</sup> Guangxi Key Laboratory of Processing for Non-ferrous Metals and Featured Materials, School of Resources, Environment and Materials, Collaborative Innovation Center of Sustainable Energy Materials, Guangxi University, 100 Daxue Dong Road, Nanning 530004, PR China.

<sup>b</sup> College of Chemistry Biology and Environmental Engineering, Xiangnan University, Chenzhou, 423043, China

<sup>‡</sup> These authors contributed equally.

\*Corresponding authors: Email: jlzhu85@163.com (Jinliang Zhu)

## Experimental Section

### Synthesis of Cu<sub>3</sub>P@NPC-CF

Clear copper foam ( $6 \times 3 \times 0.15$  cm) was covered on a corundum boat containing 1.8 g of phosphoramidic acid resin (Shanghai Xrun Resin Co., Ltd, China). The corundum boat was placed in a tube furnace and the temperature raised to 900 °C at a rate of 5 °C per minute, and then maintained at this temperature for 1 hour under a N<sub>2</sub> atmosphere. After cooling to 30 °C, porous nanosheets of N, P co-doped carbon wrapped in Cu<sub>3</sub>P, grown on the copper foam were obtained and noted as Cu<sub>3</sub>P@NPC-CF. For comparison, N, P co-doped carbon (NPC) was synthesized under the same condition without the copper foam.

### Physical characterization

The morphology of the catalyst was analyzed by field-emission scanning electron microscopy (SEM, SU8220, Hitachi Corp., Japan), atomic force microscope (Bruker, USA) and transmission electron microscope (TEM, Tian ETEM G2 80-300, FEI Corp., USA). The X-ray diffraction pattern was tested by D/Max-III Diffractometer (Rigaku Corporation, Japan) from 20-80° with a scanning speed of 6° min<sup>-1</sup>. X-ray photoelectron spectroscopy (XPS, ESCALab 250Xi, Thermo Fisher Scientific, USA; Al K $\alpha$ ) was used to analyze the elemental composition, electronic structure and chemical state of the material surface. The specific surface area and pore size distributions were calculated by the N<sub>2</sub> isothermal adsorption/desorption curves at 77 K.

### Electrochemical Characterization

Electrochemical performance tests were performed on an electrochemical workstation (Zahner IM6e, Germany). In a three-electrode system, Cu<sub>3</sub>P@NPC-CF served as the working electrode, whilst a graphite rod and a reversible hydrogen electrode (RHE) served as the counter electrode and reference electrode, respectively. The polarization curves were obtained by linear scanning voltammetry (LSV) with a scanning range of 0.1 to -0.8 V vs. RHE and a scanning speed of 5 mV s<sup>-1</sup> in 0.5 M H<sub>2</sub>SO<sub>4</sub> (pH=0), 1 M PBS (pH=7), and 1 M KOH (pH=14), respectively. Electrochemical impedance spectroscopy (EIS) was conducted between 100 kHz and 100 mHz. The electrochemically surface area (ECSA) was characterized by dual layer capacitance (C<sub>dl</sub>) which was obtained by CV from 1.2 to 1.25 V vs. RHE at different scanning speeds.

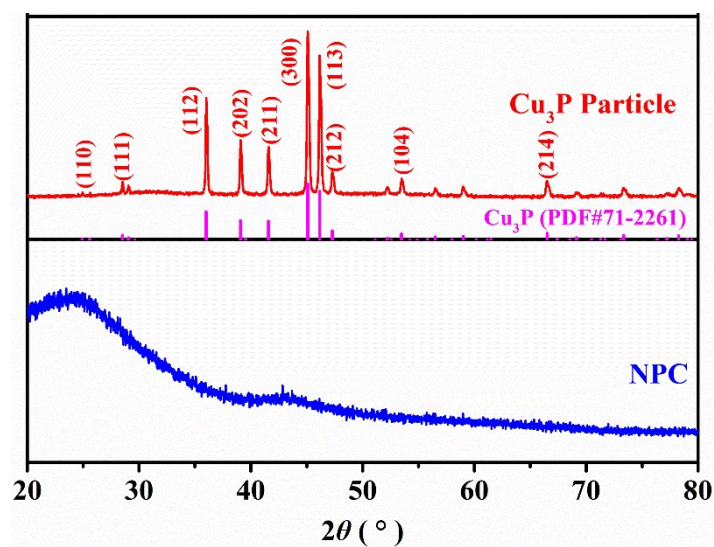

Fig. S1 XRD pattern of  $\text{Cu}_3\text{P}$  particle and NPC.

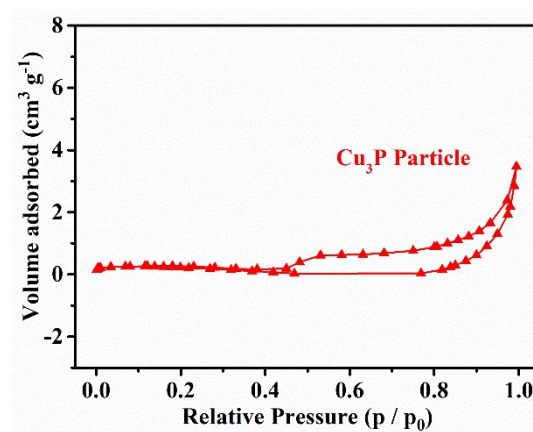

Fig. S2  $\text{N}_2$  adsorption/desorption isotherm  $\text{Cu}_3\text{P}$  particle.

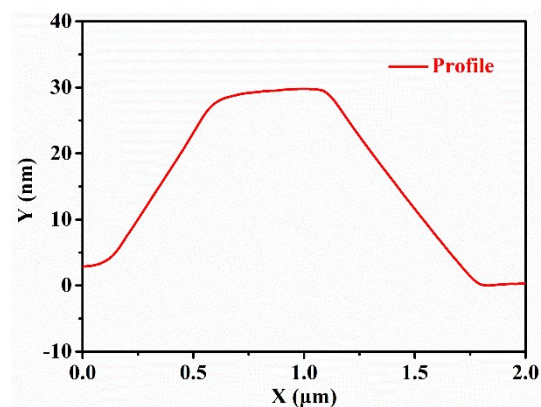

Fig. S3 The height profile of  $\text{Cu}_3\text{P}@\text{NPC-CF}$

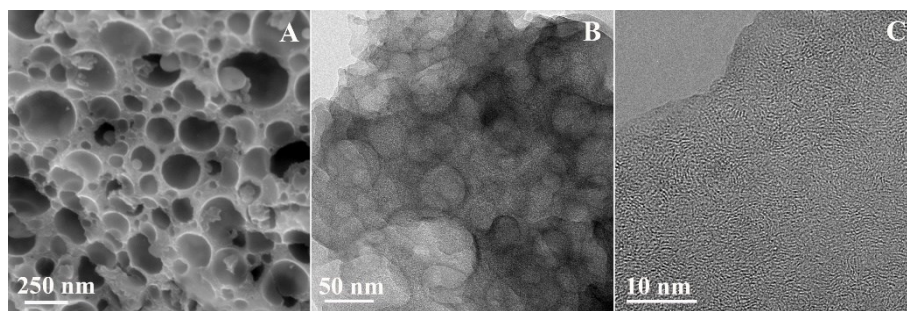

**Fig. S4** (A) SEM image, (B) TEM image, and (C) HRTEM image of NPC.

The SEM and TEM images (**Fig. S4A and B**) show that the NPC possess a porous structure.

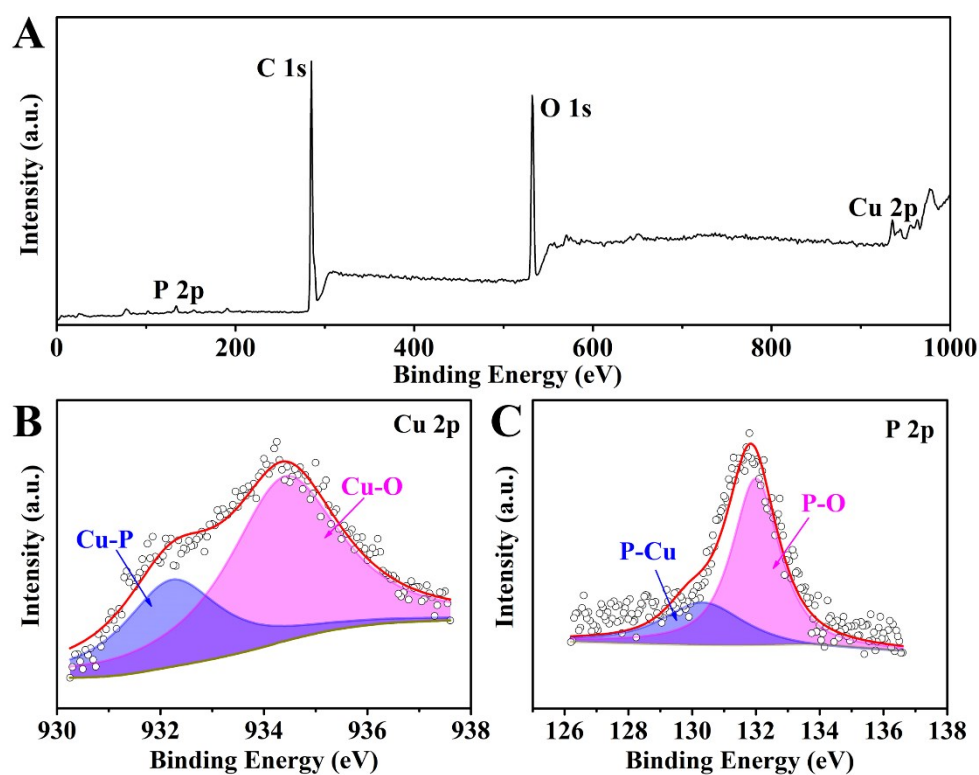

**Fig. S5** (A) Survey XPS spectra, high-resolution XPS spectra of (B) Cu 2p, (C) P 2p for  $\text{Cu}_3\text{P}$  particle.

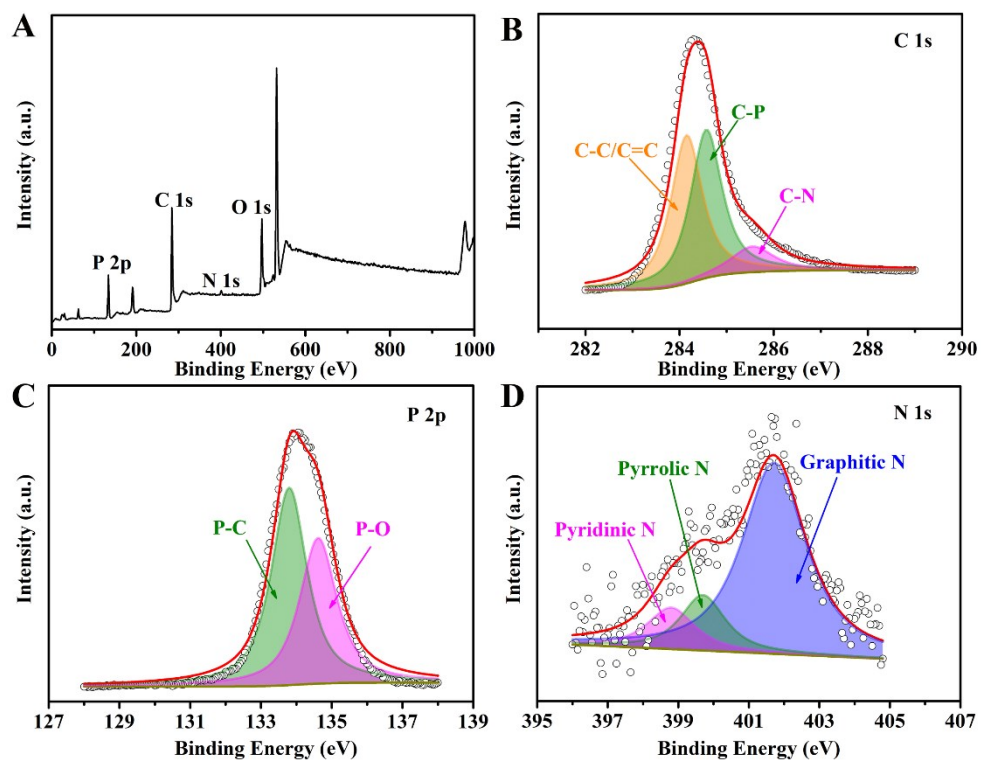

**Fig. S6** (A) Survey XPS spectra, high-resolution XPS spectra of (B) C 1s, (C) P 2p, (D) N 1s for NPC.

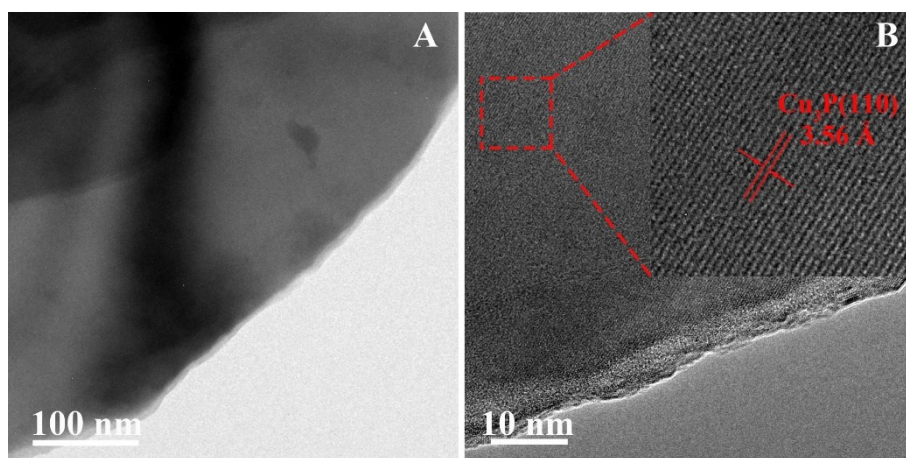

**Fig. S7** (A) TEM, and (B) HRTEM image of  $\text{Cu}_3\text{P}@\text{NPC}$ -CF after continuous potential cycling in 1 M KOH.

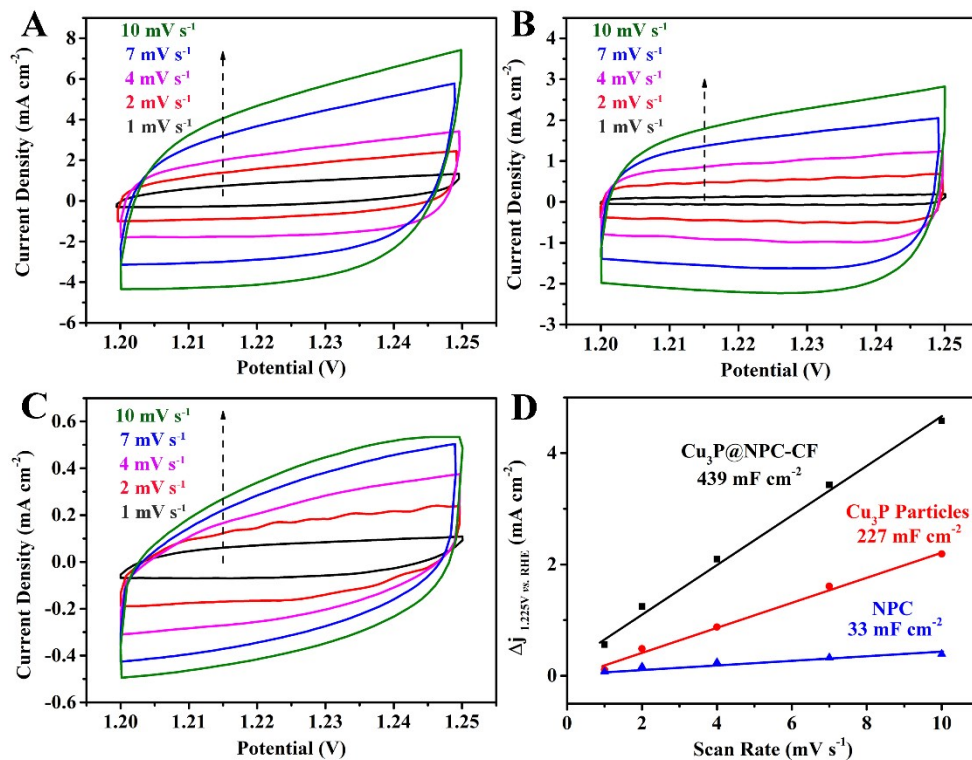

**Fig. S8** CV curves of (A) Cu<sub>3</sub>P@NPC-CF, (B) Cu<sub>3</sub>P particle and (C) NPC with different scan rates. (D) The  $C_{dl}$  of Cu<sub>3</sub>P@NPC-CF, Cu<sub>3</sub>P particle, and NPC.

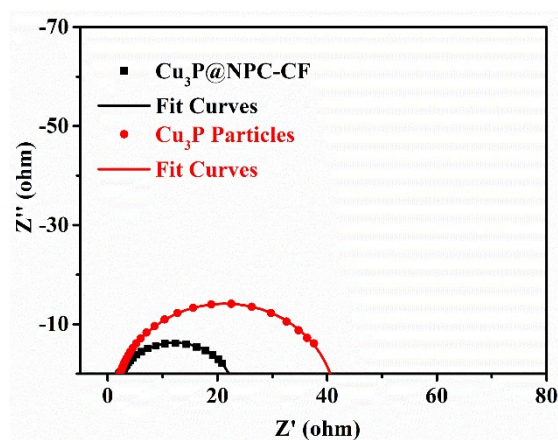

**Fig. S9** Nyquist plots of Cu<sub>3</sub>P@NPC-CF and Cu<sub>3</sub>P particle for HER with a test voltage of -0.2 V.



**Table S1** Comparison of Cu<sub>3</sub>P@NPC-CF and catalysts reported for HER in 0.5 M H<sub>2</sub>SO<sub>4</sub>.

| Catalysts                                       | Tafel<br>(mV dec <sup>-1</sup> ) | $\eta_{10}$ (mV) | Stability test<br>(h) | Current<br>retention<br>rate | Ref.         |
|-------------------------------------------------|----------------------------------|------------------|-----------------------|------------------------------|--------------|
| Cu <sub>3</sub> P@NPC-CF                        | 81.25                            | 81.94            | 90                    | 81.32%                       | This<br>Work |
| Ni <sub>0.25</sub> Cu <sub>0.75</sub> /C        | 84                               | 184              | 20000 s               | 99%                          | [S1]         |
| Ni <sub>0.85</sub> Se@NC                        | 85                               | 131              | 10                    | 99.8%                        | [S2]         |
| PdNi NWs                                        | 96                               | 91               | 1000 cycles           | ---                          | [S3]         |
| Cu@MoS <sub>2</sub>                             | 51                               | 131              | ~7                    | ---                          | [S4]         |
| Cu <sub>3</sub> P NW/CF                         | 67                               | 143              | 25                    | ---                          | [S5]         |
| NC-CF-PSFN                                      | 90.2                             | 124              | 10                    | ---                          | [S6]         |
| a-C/Cu <sub>3</sub> P@ 400 °C                   | 72                               | 287              | 1000 cycles           | -                            | [S7]         |
| Broom-like CuGeO <sub>3</sub>                   | 98                               | 135              | 80                    | ---                          | [S8]         |
| Cu <sub>2</sub> @Ni <sub>5</sub> P <sub>4</sub> | 49                               | 90               | 84                    | CP                           | [S9]         |
| Ni <sub>3</sub> Cu <sub>1</sub> @NG-NC          | 84.2                             | 122              | 80                    | CP                           | [S10]        |
| Fe <sub>x</sub> P@NPC                           | 81                               | 227              | 11                    | CP                           | [S11]        |
| CoP <sub>3</sub> /CoMoP-5/NF                    | 66.1                             | 125              | 20                    | ---                          | [S12]        |
| Cu-Co-P                                         | 59                               | 262              | 72                    | CP                           | [S13]        |

**Table S2** Comparison of Cu<sub>3</sub>P@NPC-CF and catalysts reported for HER in 1 M PBS.

| Catalysts                                                          | Tafel<br>(mV dec <sup>-1</sup> ) | $\eta_{10}$ (mV) | Stability test<br>(h) | Current<br>retention<br>rate | Ref.         |
|--------------------------------------------------------------------|----------------------------------|------------------|-----------------------|------------------------------|--------------|
| Cu <sub>3</sub> P@NPC-CF                                           | 123.71                           | 192.52           | 90                    | 96.06%                       | This<br>Work |
| Mo-WC@NCS                                                          | 95                               | 221              | 12                    | CP                           | [S14]        |
| Er <sub>2</sub> Si <sub>2</sub> O <sub>7</sub> :IrO <sub>2-5</sub> | 67                               | 190              | ~4                    | ---                          | [S15]        |
| CoP/NCNT-CP                                                        | 100                              | 305              | 10                    | CP                           | [S16]        |
| CoO/CoSe <sub>2</sub>                                              | 131                              | 337              | 9                     | ---                          | [S17]        |
| Fe-Co <sub>9</sub> S <sub>8</sub> NSs/C                            | 126.9                            | 192              | 20                    | ---                          | [S18]        |
| NiFe <sub>2</sub> O <sub>4</sub> /NF                               | 81.3                             | 197              | 24                    | ---                          | [S19]        |
| Ni <sub>3</sub> N@Ni-Bi NS/Ti                                      | 190                              | 265              | 20                    | ---                          | [S20]        |
| CuS@C                                                              | -                                | 399              | 1000 cycles           | -                            | [S21]        |
| Co-B                                                               | 75                               | 251              | 44                    | ---                          | [S22]        |
| Ni-Mo-S/C (1:1)                                                    | 85.3                             | 200              | 30000 s               | 97.5%                        | [S23]        |



**Table S3** Comparison of Cu<sub>3</sub>P@NPC-CF and catalysts reported for HER in 1 M KOH.

| Catalysts                                                          | Tafel<br>(mV dec <sup>-1</sup> ) | $\eta_{10}$ (mV) | Stability test<br>(h) | Current<br>retention<br>rate | Ref.         |
|--------------------------------------------------------------------|----------------------------------|------------------|-----------------------|------------------------------|--------------|
| Cu <sub>3</sub> P@NPC-CF                                           | 93.14                            | 135.45           | 90                    | 95.61%                       | This<br>Work |
| NiCoP/SCW                                                          | 64.4                             | 178              | 36                    | 83.3%                        | [S24]        |
| Cu <sub>0.50</sub> Fe <sub>0.50</sub> /NF                          | 62.18                            | 158              | 100                   | CP                           | [S25]        |
| CuCoO-NWs                                                          | 108                              | 140              | 50                    | ---                          | [S26]        |
| Cu <sub>3</sub> N/NF                                               | 122                              | 118              | 14                    | ---                          | [S27]        |
| Cu-Co-P                                                            | 86                               | 231              | 72                    | CP                           | [S13]        |
| Ni <sub>3</sub> P MPs                                              | 119                              | 291              | 16                    | CP                           | [S28]        |
| CoP@FeCoP/NC                                                       | 47.98                            | 141              | 20                    | CP                           | [S29]        |
| CuCo <sub>2</sub> S <sub>4</sub> /NiCo <sub>2</sub> S <sub>4</sub> | 90                               | 206              | 15                    | CP                           | [S30]        |
| Ni-Co-P/NF                                                         | 108.4                            | 156              | 20                    | ---                          | [S31]        |
| Co/CoP HNC                                                         | 105.6                            | 180              | 10                    | CP (add<br>~30%)             | [S32]        |

## References

- S1. M. A. Ahsan, A. R. Puente Santiago, Y. Hong, N. Zhang, M. Cano, E. Rodriguez-Castellon, L. Echegoyen, S. T. Sreenivasan and J. C. Noveron, *J. Am. Chem. Soc.*, 2020, **142**, 14688-14701.
- S2. Z. Huang, B. Xu, Z. Li, J. Ren, H. Mei, Z. Liu, D. Xie, H. Zhang, F. Dai, R. Wang and D. Sun, *Small*, 2020, **16**, 2004231.
- S3. L. Du, D. Feng, X. Xing, C. Wang, G. S. Armatas and D. Yang, *Chem. Eng.J.*, 2020, **400**, 125864.
- S4. L. Ji, P. Yan, C. Zhu, C. Ma, W. Wu, C. Wei, Y. Shen, S. Chu, J. Wang, Y. Du, J. Chen, X. Yang and Q. Xu, *Appl. Catal. B-Environ.*, 2019, **251**, 87-93.
- S5. J. Tian, Q. Liu, N. Cheng, A. M. Asiri and X. Sun, *Angew. Chem. Int. Ed.*, 2014, **53**, 9577-9581.
- S6. X. Liu, L. Yang, Z. Zhou, L. Zeng, H. Liu, Y. Deng, J. Yu, C. Yang and W. Zhou, *Chem. Eng.J.*, 2020, **399**, 125779.
- S7. A. Manikandan, P. Sriram, K.-C. Hsu, Y.-C. Wang, C.-W. Chen, Y.-C. Shih, T.-J. Yen, H.-T. Jeng, H.-C. Kuo and Y.-L. Chueh, *Electrochim. Acta*, 2019, **318**, 374-383.
- S8. Y. Xiao, B. Li, L. Qin, H. Lin, Q. Li, M. Nie, Y. Li and B. Liao, *Catal. Commun.*, 2020, **144**, 106075.
- S9. M. Das, N. Jena, T. Purkait, N. Kamboj, A. De Sarkar and R. S. Dey, *J. Mater. Chem. A*, 2019, **7**, 23989-23999.
- S10. B. Liu, H. Q. Peng, J. Cheng, K. Zhang, D. Chen, D. Shen, S. Wu, T. Jiao, X. Kong, Q. Gao, S. Bu, C. S. Lee and W. Zhang, *Small*, 2019, **15**, 1901545.
- S11. Y. Cheng, J. Guo, Y. Huang, Z. Liao and Z. Xiang, *Nano Energy*, 2017, **35**, 115-120.

- S12. D. Jiang, Y. Xu, R. Yang, D. Li, S. Meng and M. Chen, *ACS Sustainable Chem. Eng.*, 2019, **7**, 9309-9317.
- S13. R. N. Wasalathanthri, S. Jeffrey, R. A. Awni, K. Sun and D. M. Giolando, *ACS Sustainable Chem. Eng.*, 2018, **7**, 3092-3100.
- S14. L. Wang, Z. Li, K. Wang, Q. Dai, C. Lei, B. Yang, Q. Zhang, L. Lei, M. K. H. Leung and Y. Hou, *Nano Energy*, 2020, **74**, 104850.
- S15. P. Karfa, K. C. Majhi and R. Madhuri, *ACS Catal.*, 2018, **8**, 8830-8843.
- S16. L. Wang, J. Cao, X. Cheng, C. Lei, Q. Dai, B. Yang, Z. Li, M. A. Younis, L. Lei, Y. Hou and K. Ostrikov, *ACS Sustainable Chem. Eng.*, 2019, **7**, 10044-10051.
- S17. K. Li, J. Zhang, R. Wu, Y. Yu and B. Zhang, *Adv Sci (Weinh)*, 2016, **3**, 1500426.
- S18. K. Ao, D. Li, Y. Yao, P. Lv, Y. Cai and Q. Wei, *Electrochim. Acta*, 2018, **264**, 157-165.
- S19. J. Liu, D. Zhu, T. Ling, A. Vasileff and S.-Z. Qiao, *Nano Energy*, 2017, **40**, 264-273.
- S20. L. Xie, F. Qu, Z. Liu, X. Ren, S. Hao, R. Ge, G. Du, A. M. Asiri, X. Sun and L. Chen, *J. Mater. Chem. A*, 2017, **5**, 7806-7810.
- S21. J. Rong, J. Xu, F. Qiu, Y. Fang, T. Zhang and Y. Zhu, *Electrochim. Acta*, 2019, **323**, 134856.
- S22. S. Gupta, N. Patel, A. Miotello and D. C. Kothari, *J. Power Sources*, 2015, **279**, 620-625.
- S23. J. Miao, F.-X. Xiao, H. B. Yang, S. Y. Khoo, J. Chen, Z. Fan, Y.-Y. Hsu, H. M. Chen, H. Zhang and B. Liu, *Sci. Adv.*, 2015, **1**, 1500259.
- S24. V. R. Jothi, R. Bose, H. Rajan, C. Jung and S. C. Yi, *Adv. Energy Mater.*, 2018, **8**, 1802615.
- S25. A. I. Inamdar, H. S. Chavan, B. Hou, C. H. Lee, S. U. Lee, S. Cha, H. Kim and H. Im, *Small*, 2020, **16**, 1905884.
- S26. M. Kuang, P. Han, Q. Wang, J. Li and G. Zheng, *Adv. Funct. Mater.*, 2016, **26**, 8555-8561.

- S27. C. Panda, P. W. Menezes, M. Zheng, S. Orthmann and M. Driess, *ACS Energy Lett.*, 2019, **4**, 747-754.
- S28. A. B. Laursen, R. B. Wexler, M. J. Whitaker, E. J. Izett, K. U. D. Calvino, S. Hwang, R. Rucker, H. Wang, J. Li, E. Garfunkel, M. Greenblatt, A. M. Rappe and G. C. Dismukes, *ACS Catal.*, 2018, **8**, 4408-4419.
- S29. J. Shi, F. Qiu, W. Yuan, M. Guo and Z.-H. Lu, *Chem. Eng.J.*, 2021, **403**, 126312.
- S30. L. Ma, J. Liang, T. Chen, Y. Liu, S. Li and G. Fang, *Electrochim. Acta*, 2019, **326**, 135002.
- S31. Y. Gong, Z. Xu, H. Pan, Y. Lin, Z. Yang and J. Wang, *J. Mater. Chem. A*, 2018, **6**, 12506-12514.
- S32. Y. Hao, Y. Xu, W. Liu and X. Sun, *Mater. Horizons*, 2018, **5**, 108-115.
